# Supplementary material for: Microbiome dynamics in the tissue and mucus of acroporid corals differ in relation to host and environmental parameters
Source: PeerJ. 2020 Aug 17;8:e9644. doi: 10.7717/peerj.9644 (PMC7439960; doi:10.7717/peerj.9644)
Supplement: Table S6 — Correlation matrix (based on Pearson’s correlation) between the 20 most abundant bacterial families in mucus and tissue of Acropora tenuis and environmental/physiological variables. [file peerj-08-9644-s005.xls]

## Sheet: env.taxa.ac
Table S6. Correlation matrix (based on Pearson’s correlation) between the 20 most abundant bacterial families in mucus and tissue of Acropora tenuis and environmental/physiological variables.
	Taxa	Env	Correlation	Pvalue	Type	AdjPvalue	Significance
1	f__Endozoicimonaceae	avg_raindays	0.0661114	0.728516	tissue	0.728516
2	f__Endozoicimonaceae	avg_raindays	0.0918572	0.642012	mucus	0.642012
3	f__Endozoicimonaceae	Salinity	0.0857557	0.670618	tissue	0.670618
4	f__Endozoicimonaceae	Salinity	-0.154436	0.451282	mucus	0.451282
5	f__Endozoicimonaceae	TSS	0.0953881	0.616084	tissue	0.616084
6	f__Endozoicimonaceae	TSS	-0.178742	0.362796	mucus	0.362796
7	f__Endozoicimonaceae	POC	-0.0976279	0.607785	tissue	0.607785
8	f__Endozoicimonaceae	POC	0.160938	0.413281	mucus	0.413281
9	f__Endozoicimonaceae	Chla	-0.0979546	0.606579	tissue	0.606579
10	f__Endozoicimonaceae	Chla	0.139746	0.478174	mucus	0.478174
11	f__Endozoicimonaceae	NH4	-0.0201165	0.920668	tissue	0.920668
12	f__Endozoicimonaceae	NH4	0.0577242	0.779405	mucus	0.779405
13	f__Endozoicimonaceae	NO2_NO3	0.00605478	0.974668	tissue	0.974668
14	f__Endozoicimonaceae	NO2_NO3	0.0943952	0.6328	mucus	0.6328
15	f__Endozoicimonaceae	Chla.Proteins	0.393521	0.042274	tissue	0.042274	*
16	f__Endozoicimonaceae	Chla.Proteins	-0.239739	0.238154	mucus	0.238154
17	f__Endozoicimonaceae	Chl.Zoox	-0.0310734	0.877721	tissue	0.877721
18	f__Endozoicimonaceae	Chl.Zoox	-0.0764233	0.710591	mucus	0.710591
19	f__Endozoicimonaceae	Zoox.Prot	0.633461	0.000389729	tissue	0.000389729	***
20	f__Endozoicimonaceae	Zoox.Prot	-0.335845	0.0934682	mucus	0.0934682
21	f__Flavobacteriaceae	avg_raindays	-0.262367	0.161317	tissue	0.161317
22	f__Flavobacteriaceae	avg_raindays	-0.0621314	0.753458	mucus	0.753458
23	f__Flavobacteriaceae	Salinity	0.203858	0.30777	tissue	0.30777
24	f__Flavobacteriaceae	Salinity	0.317426	0.114075	mucus	0.114075
25	f__Flavobacteriaceae	TSS	0.144752	0.445354	tissue	0.445354
26	f__Flavobacteriaceae	TSS	0.406949	0.0316185	mucus	0.0316185	*
27	f__Flavobacteriaceae	POC	0.0157567	0.934137	tissue	0.934137
28	f__Flavobacteriaceae	POC	-0.102423	0.60402	mucus	0.60402
29	f__Flavobacteriaceae	Chla	0.0667235	0.726097	tissue	0.726097
30	f__Flavobacteriaceae	Chla	-0.0236825	0.904785	mucus	0.904785
31	f__Flavobacteriaceae	NH4	-0.0398128	0.843701	tissue	0.843701
32	f__Flavobacteriaceae	NH4	0.0517972	0.801587	mucus	0.801587
33	f__Flavobacteriaceae	NO2_NO3	-0.188428	0.318679	tissue	0.318679
34	f__Flavobacteriaceae	NO2_NO3	-0.137444	0.485522	mucus	0.485522
35	f__Flavobacteriaceae	Chla.Proteins	-0.172994	0.388193	tissue	0.388193
36	f__Flavobacteriaceae	Chla.Proteins	0.0745463	0.71741	mucus	0.71741
37	f__Flavobacteriaceae	Chl.Zoox	0.12558	0.53254	tissue	0.53254
38	f__Flavobacteriaceae	Chl.Zoox	-0.266899	0.187486	mucus	0.187486
39	f__Flavobacteriaceae	Zoox.Prot	-0.360215	0.0649389	tissue	0.0649389
40	f__Flavobacteriaceae	Zoox.Prot	0.382942	0.0534912	mucus	0.0534912
41	f__Synechococcaceae	avg_raindays	0.227833	0.225945	tissue	0.225945
42	f__Synechococcaceae	avg_raindays	0.346228	0.0711022	mucus	0.0711022
43	f__Synechococcaceae	Salinity	-0.366033	0.0604189	tissue	0.0604189
44	f__Synechococcaceae	Salinity	-0.606858	0.00101235	mucus	0.00101235	**
45	f__Synechococcaceae	TSS	-0.379527	0.0385895	tissue	0.0385895	*
46	f__Synechococcaceae	TSS	-0.405007	0.0325197	mucus	0.0325197	*
47	f__Synechococcaceae	POC	0.115653	0.542796	tissue	0.542796
48	f__Synechococcaceae	POC	0.290529	0.133664	mucus	0.133664
49	f__Synechococcaceae	Chla	0.0368077	0.846878	tissue	0.846878
50	f__Synechococcaceae	Chla	-0.106988	0.587903	mucus	0.587903
51	f__Synechococcaceae	NH4	0.239028	0.229845	tissue	0.229845
52	f__Synechococcaceae	NH4	0.0521027	0.80044	mucus	0.80044
53	f__Synechococcaceae	NO2_NO3	0.352519	0.0560521	tissue	0.0560521
54	f__Synechococcaceae	NO2_NO3	0.562923	0.00181713	mucus	0.00181713	**
55	f__Synechococcaceae	Chla.Proteins	-0.344178	0.0787581	tissue	0.0787581
56	f__Synechococcaceae	Chla.Proteins	-0.0977851	0.634625	mucus	0.634625
57	f__Synechococcaceae	Chl.Zoox	-0.115482	0.566243	tissue	0.566243
58	f__Synechococcaceae	Chl.Zoox	0.119448	0.561105	mucus	0.561105
59	f__Synechococcaceae	Zoox.Prot	-0.430226	0.0250921	tissue	0.0250921	*
60	f__Synechococcaceae	Zoox.Prot	-0.358528	0.0720875	mucus	0.0720875
61	f__Rhodobacteraceae	avg_raindays	0.144473	0.44624	tissue	0.44624
62	f__Rhodobacteraceae	avg_raindays	0.139318	0.479534	mucus	0.479534
63	f__Rhodobacteraceae	Salinity	0.0155592	0.938602	tissue	0.938602
64	f__Rhodobacteraceae	Salinity	0.108699	0.597104	mucus	0.597104
65	f__Rhodobacteraceae	TSS	-0.103882	0.584868	tissue	0.584868
66	f__Rhodobacteraceae	TSS	0.207782	0.288697	mucus	0.288697
67	f__Rhodobacteraceae	POC	0.00309742	0.987039	tissue	0.987039
68	f__Rhodobacteraceae	POC	0.12357	0.531009	mucus	0.531009
69	f__Rhodobacteraceae	Chla	-0.190436	0.313452	tissue	0.313452
70	f__Rhodobacteraceae	Chla	0.371115	0.0518598	mucus	0.0518598
71	f__Rhodobacteraceae	NH4	0.182361	0.362608	tissue	0.362608
72	f__Rhodobacteraceae	NH4	0.391921	0.0476855	mucus	0.0476855	*
73	f__Rhodobacteraceae	NO2_NO3	0.0869531	0.647749	tissue	0.647749
74	f__Rhodobacteraceae	NO2_NO3	-0.134449	0.495171	mucus	0.495171
75	f__Rhodobacteraceae	Chla.Proteins	-0.143156	0.476253	tissue	0.476253
76	f__Rhodobacteraceae	Chla.Proteins	-0.403315	0.0410447	mucus	0.0410447	*
77	f__Rhodobacteraceae	Chl.Zoox	-0.0161343	0.936337	tissue	0.936337
78	f__Rhodobacteraceae	Chl.Zoox	-0.209964	0.30325	mucus	0.30325
79	f__Rhodobacteraceae	Zoox.Prot	-0.232329	0.243561	tissue	0.243561
80	f__Rhodobacteraceae	Zoox.Prot	-0.220112	0.279929	mucus	0.279929
81	f__Pelagibacteraceae	avg_raindays	-0.242957	0.195778	tissue	0.195778
82	f__Pelagibacteraceae	avg_raindays	-0.155891	0.428272	mucus	0.428272
83	f__Pelagibacteraceae	Salinity	0.0788604	0.695804	tissue	0.695804
84	f__Pelagibacteraceae	Salinity	-0.356086	0.0741898	mucus	0.0741898
85	f__Pelagibacteraceae	TSS	-0.0760601	0.689543	tissue	0.689543
86	f__Pelagibacteraceae	TSS	-0.385329	0.0428706	mucus	0.0428706	*
87	f__Pelagibacteraceae	POC	-0.0886546	0.64131	tissue	0.64131
88	f__Pelagibacteraceae	POC	-0.475454	0.0105563	mucus	0.0105563	*
89	f__Pelagibacteraceae	Chla	-0.0998271	0.599683	tissue	0.599683
90	f__Pelagibacteraceae	Chla	-0.463186	0.0130557	mucus	0.0130557	*
91	f__Pelagibacteraceae	NH4	-0.0911444	0.651173	tissue	0.651173
92	f__Pelagibacteraceae	NH4	-0.206328	0.311891	mucus	0.311891
93	f__Pelagibacteraceae	NO2_NO3	0.0319862	0.866746	tissue	0.866746
94	f__Pelagibacteraceae	NO2_NO3	0.149092	0.448932	mucus	0.448932
95	f__Pelagibacteraceae	Chla.Proteins	0.195941	0.327334	tissue	0.327334
96	f__Pelagibacteraceae	Chla.Proteins	0.395088	0.0457604	mucus	0.0457604	*
97	f__Pelagibacteraceae	Chl.Zoox	0.274111	0.166483	tissue	0.166483
98	f__Pelagibacteraceae	Chl.Zoox	0.26817	0.185314	mucus	0.185314
99	f__Pelagibacteraceae	Zoox.Prot	0.128783	0.522052	tissue	0.522052
100	f__Pelagibacteraceae	Zoox.Prot	0.215977	0.289291	mucus	0.289291
101	k__Bacteria_unclassified	avg_raindays	0.138274	0.466192	tissue	0.466192
102	k__Bacteria_unclassified	avg_raindays	0.0296941	0.880768	mucus	0.880768
103	k__Bacteria_unclassified	Salinity	-0.298335	0.130661	tissue	0.130661
104	k__Bacteria_unclassified	Salinity	0.176549	0.388271	mucus	0.388271
105	k__Bacteria_unclassified	TSS	-0.0893122	0.638829	tissue	0.638829
106	k__Bacteria_unclassified	TSS	-0.106356	0.590123	mucus	0.590123
107	k__Bacteria_unclassified	POC	0.202465	0.283276	tissue	0.283276
108	k__Bacteria_unclassified	POC	-0.157469	0.423555	mucus	0.423555
109	k__Bacteria_unclassified	Chla	0.231069	0.219241	tissue	0.219241
110	k__Bacteria_unclassified	Chla	-0.0580099	0.76936	mucus	0.76936
111	k__Bacteria_unclassified	NH4	-0.0995615	0.621244	tissue	0.621244
112	k__Bacteria_unclassified	NH4	0.0538136	0.794023	mucus	0.794023
113	k__Bacteria_unclassified	NO2_NO3	0.224883	0.232175	tissue	0.232175
114	k__Bacteria_unclassified	NO2_NO3	-0.217057	0.267221	mucus	0.267221
115	k__Bacteria_unclassified	Chla.Proteins	-0.333742	0.0888885	tissue	0.0888885
116	k__Bacteria_unclassified	Chla.Proteins	-0.0932487	0.65049	mucus	0.65049
117	k__Bacteria_unclassified	Chl.Zoox	-0.151495	0.450662	tissue	0.450662
118	k__Bacteria_unclassified	Chl.Zoox	-0.157645	0.441815	mucus	0.441815
119	k__Bacteria_unclassified	Zoox.Prot	-0.411911	0.0327704	tissue	0.0327704	*
120	k__Bacteria_unclassified	Zoox.Prot	0.0675629	0.74296	mucus	0.74296
121	c__Alphaproteobacteria_unclassified	avg_raindays	-0.0643063	0.735662	tissue	0.735662
122	c__Alphaproteobacteria_unclassified	avg_raindays	0.107309	0.586777	mucus	0.586777
123	c__Alphaproteobacteria_unclassified	Salinity	0.0735966	0.715247	tissue	0.715247
124	c__Alphaproteobacteria_unclassified	Salinity	-0.143195	0.485269	mucus	0.485269
125	c__Alphaproteobacteria_unclassified	TSS	0.0232984	0.902737	tissue	0.902737
126	c__Alphaproteobacteria_unclassified	TSS	-0.188143	0.337676	mucus	0.337676
127	c__Alphaproteobacteria_unclassified	POC	-0.214312	0.255441	tissue	0.255441
128	c__Alphaproteobacteria_unclassified	POC	-0.190338	0.331964	mucus	0.331964
129	c__Alphaproteobacteria_unclassified	Chla	-0.141241	0.456585	tissue	0.456585
130	c__Alphaproteobacteria_unclassified	Chla	-0.00478708	0.980712	mucus	0.980712
131	c__Alphaproteobacteria_unclassified	NH4	0.151731	0.44995	tissue	0.44995
132	c__Alphaproteobacteria_unclassified	NH4	0.0844908	0.681537	mucus	0.681537
133	c__Alphaproteobacteria_unclassified	NO2_NO3	0.144443	0.446337	tissue	0.446337
134	c__Alphaproteobacteria_unclassified	NO2_NO3	-0.0194023	0.921936	mucus	0.921936
135	c__Alphaproteobacteria_unclassified	Chla.Proteins	0.229736	0.24901	tissue	0.24901
136	c__Alphaproteobacteria_unclassified	Chla.Proteins	-0.0117293	0.95465	mucus	0.95465
137	c__Alphaproteobacteria_unclassified	Chl.Zoox	0.275106	0.164887	tissue	0.164887
138	c__Alphaproteobacteria_unclassified	Chl.Zoox	-0.00834492	0.967727	mucus	0.967727
139	c__Alphaproteobacteria_unclassified	Zoox.Prot	0.169753	0.397278	tissue	0.397278
140	c__Alphaproteobacteria_unclassified	Zoox.Prot	-0.00562483	0.978244	mucus	0.978244
141	p__Proteobacteria_unclassified	avg_raindays	-0.0129899	0.945684	tissue	0.945684
142	p__Proteobacteria_unclassified	avg_raindays	-0.191433	0.329138	mucus	0.329138
143	p__Proteobacteria_unclassified	Salinity	-0.249216	0.209995	tissue	0.209995
144	p__Proteobacteria_unclassified	Salinity	-0.00547641	0.978818	mucus	0.978818
145	p__Proteobacteria_unclassified	TSS	-0.306239	0.0997881	tissue	0.0997881
146	p__Proteobacteria_unclassified	TSS	0.0969927	0.623428	mucus	0.623428
147	p__Proteobacteria_unclassified	POC	0.0786564	0.679494	tissue	0.679494
148	p__Proteobacteria_unclassified	POC	0.105002	0.594892	mucus	0.594892
149	p__Proteobacteria_unclassified	Chla	0.168129	0.374489	tissue	0.374489
150	p__Proteobacteria_unclassified	Chla	0.259392	0.182551	mucus	0.182551
151	p__Proteobacteria_unclassified	NH4	0.181538	0.364816	tissue	0.364816
152	p__Proteobacteria_unclassified	NH4	-0.361355	0.0697103	mucus	0.0697103
153	p__Proteobacteria_unclassified	NO2_NO3	0.0575955	0.762416	tissue	0.762416
154	p__Proteobacteria_unclassified	NO2_NO3	-0.246054	0.206896	mucus	0.206896
155	p__Proteobacteria_unclassified	Chla.Proteins	-0.247856	0.212575	tissue	0.212575
156	p__Proteobacteria_unclassified	Chla.Proteins	0.279332	0.166983	mucus	0.166983
157	p__Proteobacteria_unclassified	Chl.Zoox	-0.17342	0.387006	tissue	0.387006
158	p__Proteobacteria_unclassified	Chl.Zoox	0.00149931	0.9942	mucus	0.9942
159	p__Proteobacteria_unclassified	Zoox.Prot	-0.213311	0.285383	tissue	0.285383
160	p__Proteobacteria_unclassified	Zoox.Prot	0.332356	0.0971395	mucus	0.0971395
161	f__Cryomorphaceae	avg_raindays	0.0171672	0.928256	tissue	0.928256
162	f__Cryomorphaceae	avg_raindays	0.266743	0.170024	mucus	0.170024
163	f__Cryomorphaceae	Salinity	0.239082	0.229738	tissue	0.229738
164	f__Cryomorphaceae	Salinity	0.229067	0.260327	mucus	0.260327
165	f__Cryomorphaceae	TSS	0.315536	0.0894081	tissue	0.0894081
166	f__Cryomorphaceae	TSS	0.14215	0.470558	mucus	0.470558
167	f__Cryomorphaceae	POC	0.011199	0.953163	tissue	0.953163
168	f__Cryomorphaceae	POC	0.269171	0.166021	mucus	0.166021
169	f__Cryomorphaceae	Chla	0.192964	0.306952	tissue	0.306952
170	f__Cryomorphaceae	Chla	-0.0232458	0.906533	mucus	0.906533
171	f__Cryomorphaceae	NH4	0.206198	0.302129	tissue	0.302129
172	f__Cryomorphaceae	NH4	0.226686	0.265449	mucus	0.265449
173	f__Cryomorphaceae	NO2_NO3	-0.180468	0.339918	tissue	0.339918
174	f__Cryomorphaceae	NO2_NO3	0.234366	0.229978	mucus	0.229978
175	f__Cryomorphaceae	Chla.Proteins	-0.151618	0.450291	tissue	0.450291
176	f__Cryomorphaceae	Chla.Proteins	0.0028407	0.989012	mucus	0.989012
177	f__Cryomorphaceae	Chl.Zoox	-0.212943	0.286234	tissue	0.286234
178	f__Cryomorphaceae	Chl.Zoox	0.258129	0.202955	mucus	0.202955
179	f__Cryomorphaceae	Zoox.Prot	0.056017	0.781383	tissue	0.781383
180	f__Cryomorphaceae	Zoox.Prot	-0.132305	0.519388	mucus	0.519388
181	f__Pirellulaceae	avg_raindays	0.0589234	0.7571	tissue	0.7571
182	f__Pirellulaceae	avg_raindays	-0.00842383	0.966066	mucus	0.966066
183	f__Pirellulaceae	Salinity	0.237431	0.233068	tissue	0.233068
184	f__Pirellulaceae	Salinity	0.442218	0.0236948	mucus	0.0236948	*
185	f__Pirellulaceae	TSS	-0.04481	0.814113	tissue	0.814113
186	f__Pirellulaceae	TSS	0.21599	0.269637	mucus	0.269637
187	f__Pirellulaceae	POC	-0.080899	0.670857	tissue	0.670857
188	f__Pirellulaceae	POC	0.0402085	0.839022	mucus	0.839022
189	f__Pirellulaceae	Chla	-0.171024	0.366198	tissue	0.366198
190	f__Pirellulaceae	Chla	0.0391936	0.843035	mucus	0.843035
191	f__Pirellulaceae	NH4	0.122469	0.542821	tissue	0.542821
192	f__Pirellulaceae	NH4	0.206034	0.312595	mucus	0.312595
193	f__Pirellulaceae	NO2_NO3	-0.0994798	0.60096	tissue	0.60096
194	f__Pirellulaceae	NO2_NO3	-0.227449	0.24442	mucus	0.24442
195	f__Pirellulaceae	Chla.Proteins	-0.104248	0.604827	tissue	0.604827
196	f__Pirellulaceae	Chla.Proteins	-0.221741	0.276295	mucus	0.276295
197	f__Pirellulaceae	Chl.Zoox	0.155365	0.43904	tissue	0.43904
198	f__Pirellulaceae	Chl.Zoox	0.0295535	0.886042	mucus	0.886042
199	f__Pirellulaceae	Zoox.Prot	-0.249033	0.21034	tissue	0.21034
200	f__Pirellulaceae	Zoox.Prot	-0.225409	0.268224	mucus	0.268224
201	f__OM60	avg_raindays	0.0391574	0.837229	tissue	0.837229
202	f__OM60	avg_raindays	0.0602311	0.760779	mucus	0.760779
203	f__OM60	Salinity	0.192261	0.336678	tissue	0.336678
204	f__OM60	Salinity	0.112804	0.583239	mucus	0.583239
205	f__OM60	TSS	0.0964036	0.612316	tissue	0.612316
206	f__OM60	TSS	0.221873	0.256489	mucus	0.256489
207	f__OM60	POC	0.0254663	0.893735	tissue	0.893735
208	f__OM60	POC	-0.00923449	0.962802	mucus	0.962802
209	f__OM60	Chla	-0.149501	0.430402	tissue	0.430402
210	f__OM60	Chla	0.0113124	0.95444	mucus	0.95444
211	f__OM60	NH4	0.03827	0.849688	tissue	0.849688
212	f__OM60	NH4	0.2503	0.217479	mucus	0.217479
213	f__OM60	NO2_NO3	-0.0247358	0.896767	tissue	0.896767
214	f__OM60	NO2_NO3	0.0822845	0.677216	mucus	0.677216
215	f__OM60	Chla.Proteins	0.0440128	0.827444	tissue	0.827444
216	f__OM60	Chla.Proteins	0.0390114	0.849929	mucus	0.849929
217	f__OM60	Chl.Zoox	0.138896	0.489608	tissue	0.489608
218	f__OM60	Chl.Zoox	0.153435	0.454257	mucus	0.454257
219	f__OM60	Zoox.Prot	-0.0613024	0.761318	tissue	0.761318
220	f__OM60	Zoox.Prot	0.0763461	0.710871	mucus	0.710871
221	f__Halomonadaceae	avg_raindays	-0.045052	0.813127	tissue	0.813127
222	f__Halomonadaceae	avg_raindays	-0.624144	0.000386056	mucus	0.000386056	***
223	f__Halomonadaceae	Salinity	0.155977	0.437217	tissue	0.437217
224	f__Halomonadaceae	Salinity	-0.0835404	0.684937	mucus	0.684937
225	f__Halomonadaceae	TSS	0.142276	0.45326	tissue	0.45326
226	f__Halomonadaceae	TSS	-0.184947	0.346094	mucus	0.346094
227	f__Halomonadaceae	POC	-0.0558923	0.76925	tissue	0.76925
228	f__Halomonadaceae	POC	-0.633113	0.000299285	mucus	0.000299285	***
229	f__Halomonadaceae	Chla	-0.0235931	0.901513	tissue	0.901513
230	f__Halomonadaceae	Chla	-0.494617	0.00745828	mucus	0.00745828	**
231	f__Halomonadaceae	NH4	0.169069	0.39921	tissue	0.39921
232	f__Halomonadaceae	NH4	-0.533333	0.00502119	mucus	0.00502119	**
233	f__Halomonadaceae	NO2_NO3	-0.118496	0.532854	tissue	0.532854
234	f__Halomonadaceae	NO2_NO3	-0.270635	0.163641	mucus	0.163641
235	f__Halomonadaceae	Chla.Proteins	-0.148545	0.459631	tissue	0.459631
236	f__Halomonadaceae	Chla.Proteins	0.620143	0.000726445	mucus	0.000726445	***
237	f__Halomonadaceae	Chl.Zoox	0.0174509	0.931154	tissue	0.931154
238	f__Halomonadaceae	Chl.Zoox	0.473792	0.0144836	mucus	0.0144836	*
239	f__Halomonadaceae	Zoox.Prot	-0.195433	0.328614	tissue	0.328614
240	f__Halomonadaceae	Zoox.Prot	0.370346	0.0625503	mucus	0.0625503
241	c__Gammaproteobacteria_unclassified	avg_raindays	0.214474	0.255073	tissue	0.255073
242	c__Gammaproteobacteria_unclassified	avg_raindays	0.000319794	0.998711	mucus	0.998711
243	c__Gammaproteobacteria_unclassified	Salinity	0.141846	0.480337	tissue	0.480337
244	c__Gammaproteobacteria_unclassified	Salinity	0.158625	0.438948	mucus	0.438948
245	c__Gammaproteobacteria_unclassified	TSS	0.108618	0.567769	tissue	0.567769
246	c__Gammaproteobacteria_unclassified	TSS	0.331701	0.0846392	mucus	0.0846392
247	c__Gammaproteobacteria_unclassified	POC	0.135379	0.475666	tissue	0.475666
248	c__Gammaproteobacteria_unclassified	POC	-0.000868429	0.996501	mucus	0.996501
249	c__Gammaproteobacteria_unclassified	Chla	-0.17077	0.366923	tissue	0.366923
250	c__Gammaproteobacteria_unclassified	Chla	0.139119	0.480168	mucus	0.480168
251	c__Gammaproteobacteria_unclassified	NH4	-0.105458	0.600619	tissue	0.600619
252	c__Gammaproteobacteria_unclassified	NH4	0.162457	0.427826	mucus	0.427826
253	c__Gammaproteobacteria_unclassified	NO2_NO3	0.047799	0.80195	tissue	0.80195
254	c__Gammaproteobacteria_unclassified	NO2_NO3	-0.174916	0.373326	mucus	0.373326
255	c__Gammaproteobacteria_unclassified	Chla.Proteins	-0.171524	0.392298	tissue	0.392298
256	c__Gammaproteobacteria_unclassified	Chla.Proteins	-0.110332	0.591571	mucus	0.591571
257	c__Gammaproteobacteria_unclassified	Chl.Zoox	-0.168372	0.401186	tissue	0.401186
258	c__Gammaproteobacteria_unclassified	Chl.Zoox	0.0174924	0.93241	mucus	0.93241
259	c__Gammaproteobacteria_unclassified	Zoox.Prot	-0.0738239	0.714403	tissue	0.714403
260	c__Gammaproteobacteria_unclassified	Zoox.Prot	-0.0538316	0.793955	mucus	0.793955
261	f__OCS155	avg_raindays	-0.0905194	0.634283	tissue	0.634283
262	f__OCS155	avg_raindays	-0.292582	0.130814	mucus	0.130814
263	f__OCS155	Salinity	-0.26781	0.176837	tissue	0.176837
264	f__OCS155	Salinity	-0.204106	0.317245	mucus	0.317245
265	f__OCS155	TSS	-0.335306	0.0700861	tissue	0.0700861
266	f__OCS155	TSS	-0.216174	0.269219	mucus	0.269219
267	f__OCS155	POC	-0.146354	0.440279	tissue	0.440279
268	f__OCS155	POC	-0.146396	0.457267	mucus	0.457267
269	f__OCS155	Chla	-0.0266737	0.888728	tissue	0.888728
270	f__OCS155	Chla	-0.240227	0.218197	mucus	0.218197
271	f__OCS155	NH4	0.10197	0.612784	tissue	0.612784
272	f__OCS155	NH4	-0.287927	0.153766	mucus	0.153766
273	f__OCS155	NO2_NO3	-0.0986048	0.604181	tissue	0.604181
274	f__OCS155	NO2_NO3	0.251601	0.196515	mucus	0.196515
275	f__OCS155	Chla.Proteins	-0.213746	0.284379	tissue	0.284379
276	f__OCS155	Chla.Proteins	0.438543	0.0250218	mucus	0.0250218	*
277	f__OCS155	Chl.Zoox	-0.205023	0.304952	tissue	0.304952
278	f__OCS155	Chl.Zoox	0.55807	0.00305067	mucus	0.00305067	**
279	f__OCS155	Zoox.Prot	-0.215259	0.280903	tissue	0.280903
280	f__OCS155	Zoox.Prot	0.0897782	0.662729	mucus	0.662729
281	f__Saprospiraceae	avg_raindays	-0.23136	0.218644	tissue	0.218644
282	f__Saprospiraceae	avg_raindays	0.212882	0.276757	mucus	0.276757
283	f__Saprospiraceae	Salinity	0.116088	0.564194	tissue	0.564194
284	f__Saprospiraceae	Salinity	0.47678	0.0137924	mucus	0.0137924	*
285	f__Saprospiraceae	TSS	0.150177	0.428297	tissue	0.428297
286	f__Saprospiraceae	TSS	0.180872	0.357009	mucus	0.357009
287	f__Saprospiraceae	POC	0.0999668	0.59917	tissue	0.59917
288	f__Saprospiraceae	POC	0.0695331	0.725149	mucus	0.725149
289	f__Saprospiraceae	Chla	0.221035	0.240473	tissue	0.240473
290	f__Saprospiraceae	Chla	-0.055342	0.779704	mucus	0.779704
291	f__Saprospiraceae	NH4	-0.333698	0.088934	tissue	0.088934
292	f__Saprospiraceae	NH4	0.0758217	0.712774	mucus	0.712774
293	f__Saprospiraceae	NO2_NO3	-0.331874	0.0731844	tissue	0.0731844
294	f__Saprospiraceae	NO2_NO3	-0.188375	0.337068	mucus	0.337068
295	f__Saprospiraceae	Chla.Proteins	0.257274	0.195142	tissue	0.195142
296	f__Saprospiraceae	Chla.Proteins	-0.280597	0.164991	mucus	0.164991
297	f__Saprospiraceae	Chl.Zoox	0.0963463	0.632611	tissue	0.632611
298	f__Saprospiraceae	Chl.Zoox	-0.208357	0.30705	mucus	0.30705
299	f__Saprospiraceae	Zoox.Prot	0.233284	0.241572	tissue	0.241572
300	f__Saprospiraceae	Zoox.Prot	-0.127308	0.535421	mucus	0.535421
301	f__Flammeovirgaceae	avg_raindays	-0.170912	0.366519	tissue	0.366519
302	f__Flammeovirgaceae	avg_raindays	0.273284	0.159397	mucus	0.159397
303	f__Flammeovirgaceae	Salinity	0.245053	0.21796	tissue	0.21796
304	f__Flammeovirgaceae	Salinity	0.262723	0.194746	mucus	0.194746
305	f__Flammeovirgaceae	TSS	0.103019	0.588006	tissue	0.588006
306	f__Flammeovirgaceae	TSS	0.332464	0.0838828	mucus	0.0838828
307	f__Flammeovirgaceae	POC	-0.0323982	0.865044	tissue	0.865044
308	f__Flammeovirgaceae	POC	0.355411	0.0634479	mucus	0.0634479
309	f__Flammeovirgaceae	Chla	0.013945	0.941697	tissue	0.941697
310	f__Flammeovirgaceae	Chla	0.122656	0.534076	mucus	0.534076
311	f__Flammeovirgaceae	NH4	-0.130656	0.515964	tissue	0.515964
312	f__Flammeovirgaceae	NH4	0.0406208	0.843812	mucus	0.843812
313	f__Flammeovirgaceae	NO2_NO3	-0.220049	0.242632	tissue	0.242632
314	f__Flammeovirgaceae	NO2_NO3	0.0575843	0.771008	mucus	0.771008
315	f__Flammeovirgaceae	Chla.Proteins	0.254312	0.200516	tissue	0.200516
316	f__Flammeovirgaceae	Chla.Proteins	-0.192453	0.346242	mucus	0.346242
317	f__Flammeovirgaceae	Chl.Zoox	0.0876141	0.663888	tissue	0.663888
318	f__Flammeovirgaceae	Chl.Zoox	-0.0720727	0.726428	mucus	0.726428
319	f__Flammeovirgaceae	Zoox.Prot	0.207825	0.298244	tissue	0.298244
320	f__Flammeovirgaceae	Zoox.Prot	-0.0588543	0.775194	mucus	0.775194
321	f__Comamonadaceae	avg_raindays	-0.126599	0.505005	tissue	0.505005
322	f__Comamonadaceae	avg_raindays	-0.172495	0.380081	mucus	0.380081
323	f__Comamonadaceae	Salinity	0.131515	0.513184	tissue	0.513184
324	f__Comamonadaceae	Salinity	0.313442	0.118941	mucus	0.118941
325	f__Comamonadaceae	TSS	0.19702	0.296698	tissue	0.296698
326	f__Comamonadaceae	TSS	0.358618	0.0609312	mucus	0.0609312
327	f__Comamonadaceae	POC	0.22211	0.238136	tissue	0.238136
328	f__Comamonadaceae	POC	0.0985498	0.617837	mucus	0.617837
329	f__Comamonadaceae	Chla	0.247252	0.187747	tissue	0.187747
330	f__Comamonadaceae	Chla	0.207255	0.289949	mucus	0.289949
331	f__Comamonadaceae	NH4	-0.0988718	0.623675	tissue	0.623675
332	f__Comamonadaceae	NH4	-0.21432	0.293095	mucus	0.293095
333	f__Comamonadaceae	NO2_NO3	-0.163657	0.387508	tissue	0.387508
334	f__Comamonadaceae	NO2_NO3	-0.331214	0.085125	mucus	0.085125
335	f__Comamonadaceae	Chla.Proteins	-0.0764599	0.704648	tissue	0.704648
336	f__Comamonadaceae	Chla.Proteins	0.0799701	0.697766	mucus	0.697766
337	f__Comamonadaceae	Chl.Zoox	-0.0255503	0.899335	tissue	0.899335
338	f__Comamonadaceae	Chl.Zoox	-0.128591	0.531283	mucus	0.531283
339	f__Comamonadaceae	Zoox.Prot	-0.0567739	0.778501	tissue	0.778501
340	f__Comamonadaceae	Zoox.Prot	0.311877	0.120893	mucus	0.120893
341	f__Verrucomicrobiaceae	avg_raindays	0.0774425	0.684185	tissue	0.684185
342	f__Verrucomicrobiaceae	avg_raindays	-0.291728	0.131994	mucus	0.131994
343	f__Verrucomicrobiaceae	Salinity	0.323156	0.100141	tissue	0.100141
344	f__Verrucomicrobiaceae	Salinity	0.167477	0.41349	mucus	0.41349
345	f__Verrucomicrobiaceae	TSS	0.135483	0.475326	tissue	0.475326
346	f__Verrucomicrobiaceae	TSS	0.145197	0.461	mucus	0.461
347	f__Verrucomicrobiaceae	POC	-0.0461554	0.808633	tissue	0.808633
348	f__Verrucomicrobiaceae	POC	-0.309685	0.10878	mucus	0.10878
349	f__Verrucomicrobiaceae	Chla	-0.111674	0.556859	tissue	0.556859
350	f__Verrucomicrobiaceae	Chla	-0.147315	0.454417	mucus	0.454417
351	f__Verrucomicrobiaceae	NH4	0.118224	0.556997	tissue	0.556997
352	f__Verrucomicrobiaceae	NH4	-0.102334	0.618873	mucus	0.618873
353	f__Verrucomicrobiaceae	NO2_NO3	-0.139497	0.462221	tissue	0.462221
354	f__Verrucomicrobiaceae	NO2_NO3	-0.419043	0.0264486	mucus	0.0264486	*
355	f__Verrucomicrobiaceae	Chla.Proteins	-0.142319	0.47886	tissue	0.47886
356	f__Verrucomicrobiaceae	Chla.Proteins	0.014368	0.944462	mucus	0.944462
357	f__Verrucomicrobiaceae	Chl.Zoox	0.123302	0.54006	tissue	0.54006
358	f__Verrucomicrobiaceae	Chl.Zoox	-0.160172	0.434439	mucus	0.434439
359	f__Verrucomicrobiaceae	Zoox.Prot	-0.267864	0.176748	tissue	0.176748
360	f__Verrucomicrobiaceae	Zoox.Prot	0.147896	0.470899	mucus	0.470899
361	f__Phyllobacteriaceae	avg_raindays	0.0659733	0.729062	tissue	0.729062
362	f__Phyllobacteriaceae	avg_raindays	0.135541	0.491641	mucus	0.491641
363	f__Phyllobacteriaceae	Salinity	-0.151434	0.450848	tissue	0.450848
364	f__Phyllobacteriaceae	Salinity	-0.00632977	0.975518	mucus	0.975518
365	f__Phyllobacteriaceae	TSS	-0.241024	0.19947	tissue	0.19947
366	f__Phyllobacteriaceae	TSS	-0.0947035	0.631685	mucus	0.631685
367	f__Phyllobacteriaceae	POC	0.116649	0.539304	tissue	0.539304
368	f__Phyllobacteriaceae	POC	0.0825097	0.67638	mucus	0.67638
369	f__Phyllobacteriaceae	Chla	0.0749996	0.693662	tissue	0.693662
370	f__Phyllobacteriaceae	Chla	0.157563	0.423273	mucus	0.423273
371	f__Phyllobacteriaceae	NH4	0.298544	0.130378	tissue	0.130378
372	f__Phyllobacteriaceae	NH4	0.031918	0.876991	mucus	0.876991
373	f__Phyllobacteriaceae	NO2_NO3	0.0339981	0.858445	tissue	0.858445
374	f__Phyllobacteriaceae	NO2_NO3	-0.0223577	0.91009	mucus	0.91009
375	f__Phyllobacteriaceae	Chla.Proteins	-0.296162	0.133622	tissue	0.133622
376	f__Phyllobacteriaceae	Chla.Proteins	-0.284903	0.158329	mucus	0.158329
377	f__Phyllobacteriaceae	Chl.Zoox	-0.131179	0.514271	tissue	0.514271
378	f__Phyllobacteriaceae	Chl.Zoox	-0.0568041	0.782838	mucus	0.782838
379	f__Phyllobacteriaceae	Zoox.Prot	-0.350841	0.0727676	tissue	0.0727676
380	f__Phyllobacteriaceae	Zoox.Prot	-0.307822	0.126062	mucus	0.126062
381	f__Alteromonadaceae	avg_raindays	-0.202336	0.28359	tissue	0.28359
382	f__Alteromonadaceae	avg_raindays	0.117409	0.551836	mucus	0.551836
383	f__Alteromonadaceae	Salinity	0.176561	0.378331	tissue	0.378331
384	f__Alteromonadaceae	Salinity	-0.292415	0.147169	mucus	0.147169
385	f__Alteromonadaceae	TSS	0.15212	0.422277	tissue	0.422277
386	f__Alteromonadaceae	TSS	-0.169977	0.38718	mucus	0.38718
387	f__Alteromonadaceae	POC	0.0663873	0.727426	tissue	0.727426
388	f__Alteromonadaceae	POC	0.260832	0.180047	mucus	0.180047
389	f__Alteromonadaceae	Chla	0.158626	0.402461	tissue	0.402461
390	f__Alteromonadaceae	Chla	0.366357	0.0551789	mucus	0.0551789
391	f__Alteromonadaceae	NH4	-0.295873	0.13402	tissue	0.13402
392	f__Alteromonadaceae	NH4	0.190816	0.350437	mucus	0.350437
393	f__Alteromonadaceae	NO2_NO3	-0.369845	0.0442606	tissue	0.0442606	*
394	f__Alteromonadaceae	NO2_NO3	0.0429378	0.82825	mucus	0.82825
395	f__Alteromonadaceae	Chla.Proteins	0.158807	0.42884	tissue	0.42884
396	f__Alteromonadaceae	Chla.Proteins	-0.280748	0.164753	mucus	0.164753
397	f__Alteromonadaceae	Chl.Zoox	0.0125211	0.950575	tissue	0.950575
398	f__Alteromonadaceae	Chl.Zoox	-0.131423	0.522201	mucus	0.522201
399	f__Alteromonadaceae	Zoox.Prot	0.172373	0.389922	tissue	0.389922
400	f__Alteromonadaceae	Zoox.Prot	-0.271113	0.180351	mucus	0.180351
